# Supplementary material for: A flexible polypyrrole/GelMA self-supported electrode for supercapacitors by confined interfacial electrodeposition
Source: Royal Society of Chemistry journal article supplement (doi:10.1039/d5ra08151c), 2026-01-01
Supplement: d5ra08151c1.pdf [file d5ra08151c1.pdf]

## Supporting Information

### **A Flexible Polypyrrole/GelMA Self-supported Electrode for Supercapacitors by Confined Interfacial Electrodeposition**

Gang Wang<sup>1#</sup>, Xuezheng Chen<sup>3#</sup>, Jiafan Guo<sup>2</sup>, Xiaomin Su<sup>2</sup>, Weijie Li<sup>2</sup>, Junyi Huang<sup>2</sup>, Wenxi Wu<sup>2</sup>, Ting Tian<sup>4</sup>, Feng Yu<sup>2\*</sup>

<sup>1</sup>School of Materials, Guangdong Industry Polytechnic University, Guangzhou 510300, China

<sup>2</sup>College of Materials and Energy, Foshan University, Foshan 528225, China

<sup>3</sup>College of Chemical Engineering, Fuzhou University, Fuzhou 350116, China

<sup>4</sup>Guangdong Canosafe Pharmatech Co., Ltd., Guangzhou 510300, China

#First Author: Gang Wang and Xuezheng Chen contribute this article equally.

\*Corresponding Author: Feng Yu (yuf@fosu.edu.cn)

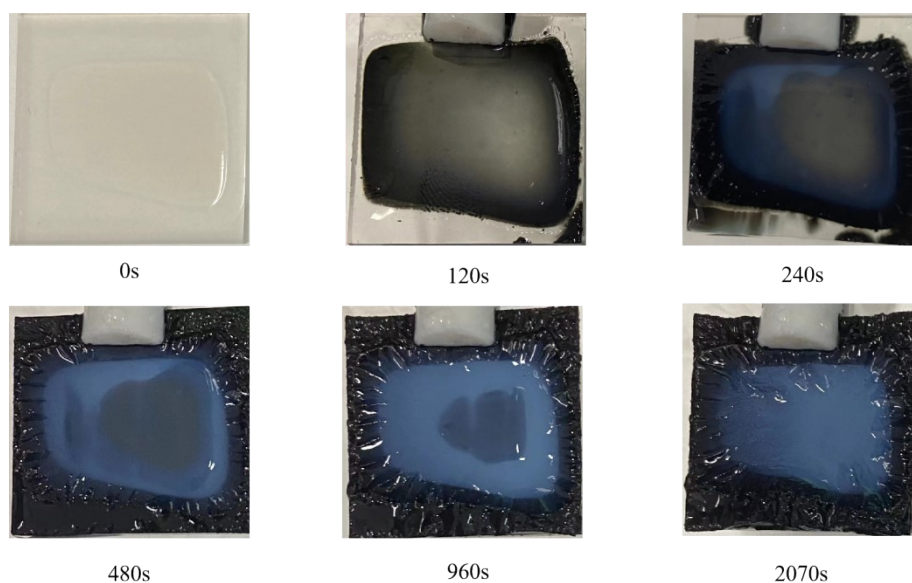

**Figure S1.** The photo of PPy/GEL films with different deposition time.

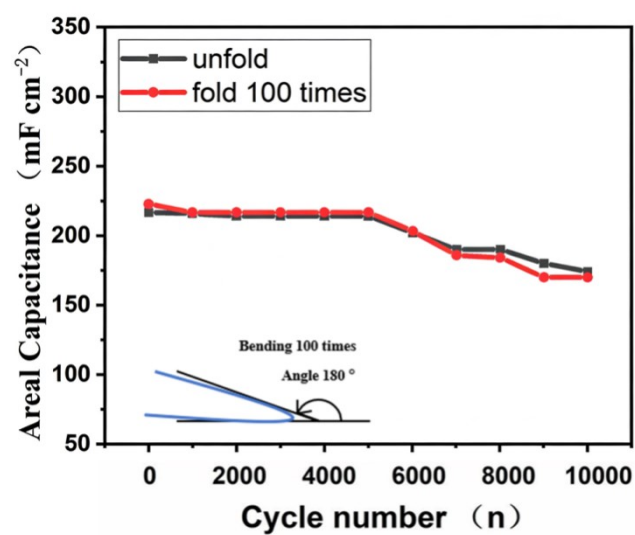

**Figure S2.** Long cycling performance of PPy/GEL-4800s electrode before and after 100 times 180° folding.

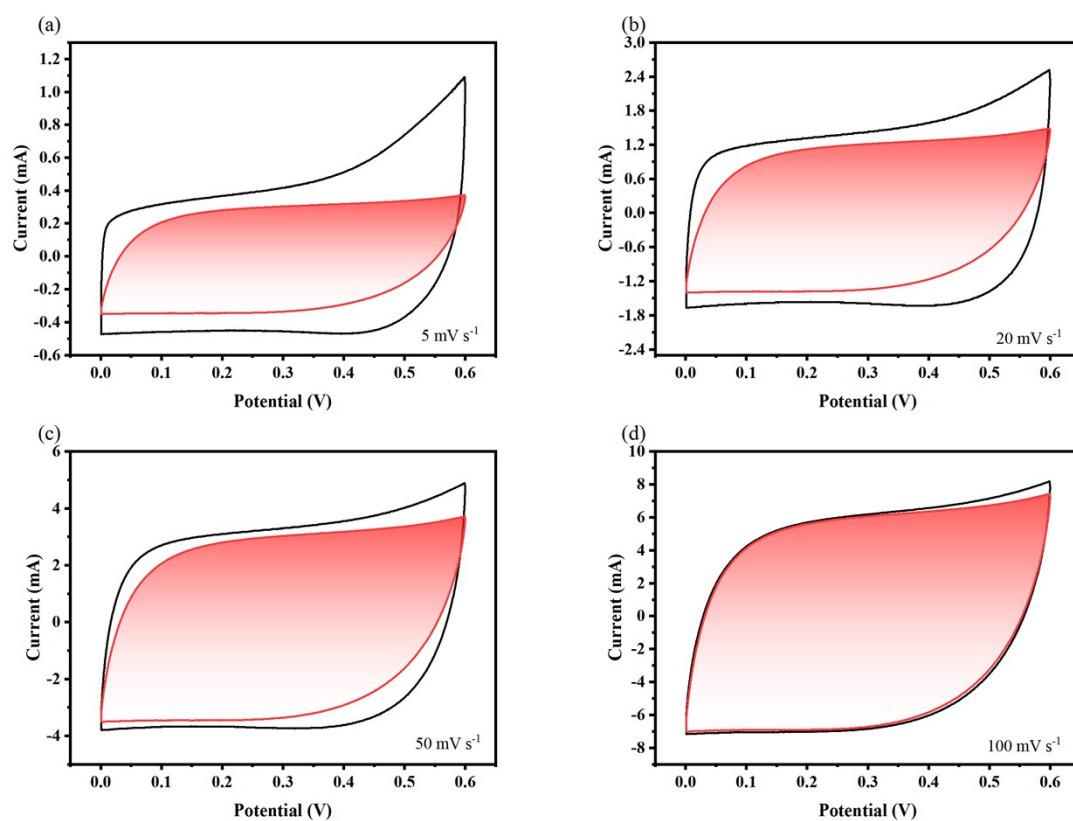

**Figure S3.** Pseudocapacitance fraction of (a) 5mV s<sup>-1</sup>, (b) 20mV s<sup>-1</sup>, (c) 50mV s<sup>-1</sup> and (d) 100 mV s<sup>-1</sup>

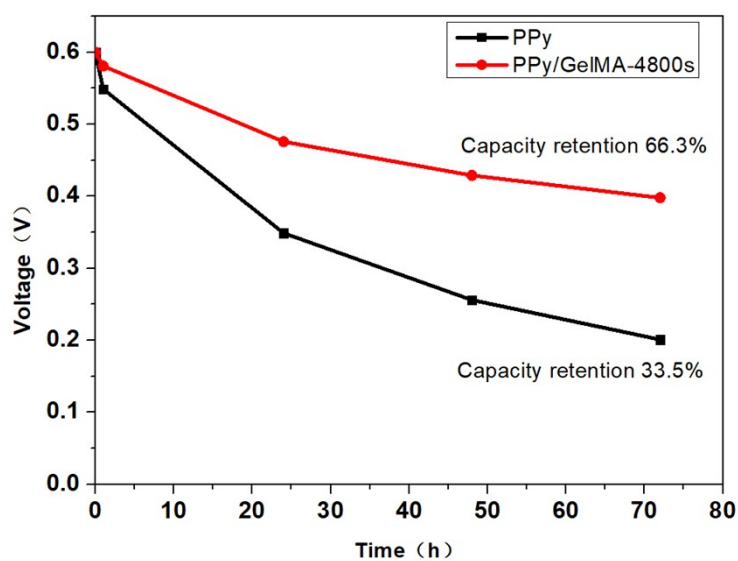

**Figure S4.** The self-discharge process of PPy and PPy/GelMA-4800s samples during 3 days.

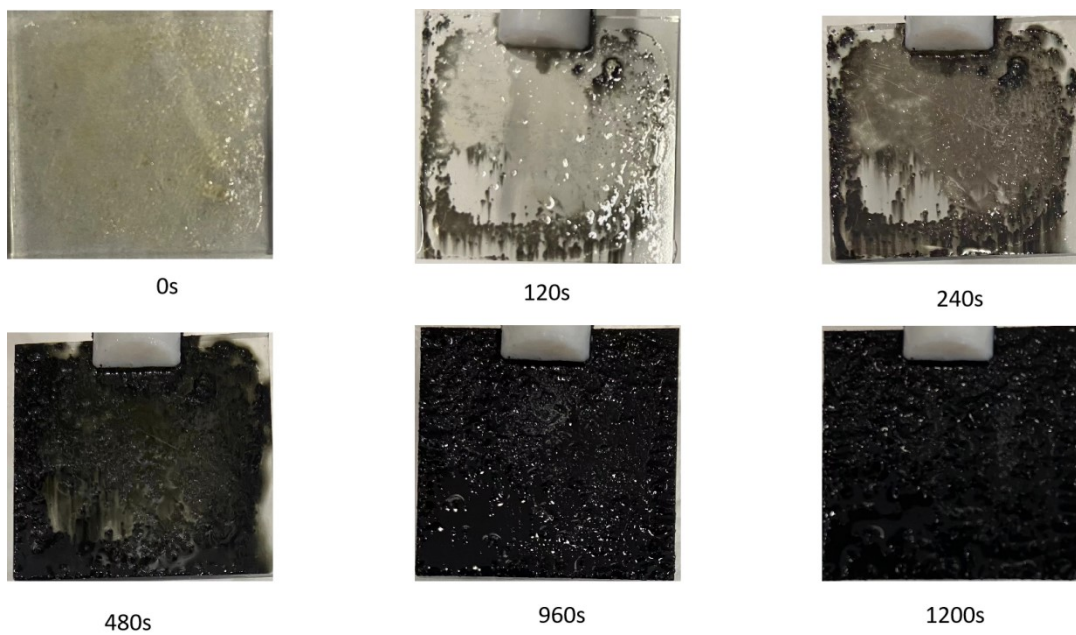

**Figure S5.** Pictures of PPy/GEL films containing Py in gelatin at different interfacial deposition time.

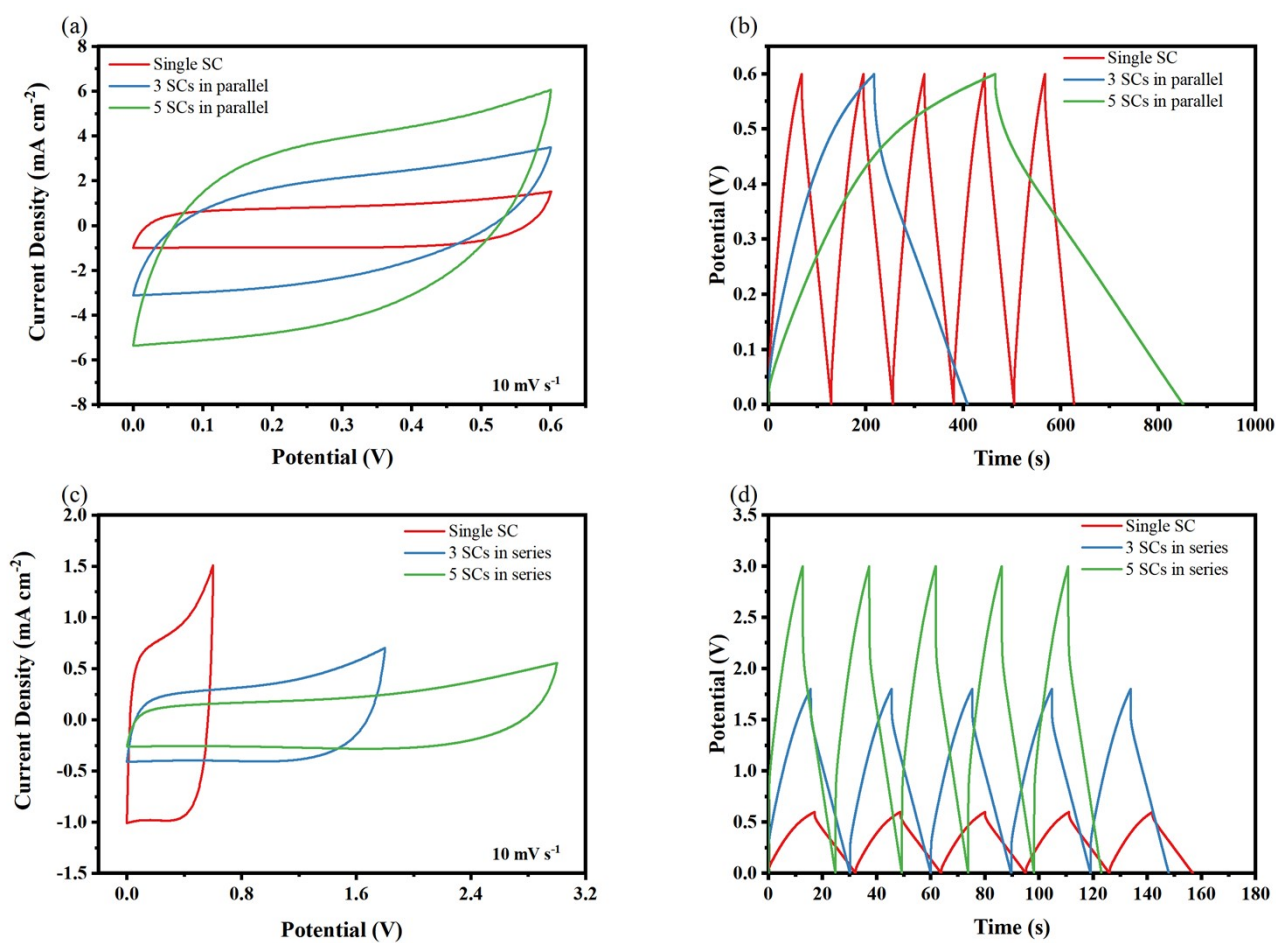

**Figure S6.** Scalability tests of supercapacitors made of PPy/GEL. (a) CVs of 1, 3 and 5 supercapacitors in parallel. (b) GCDs of 1, 3 and 5 supercapacitors in parallel. (c) CVs of 1, 3 and 5 supercapacitors in series. (d) GCDs of 1, 3 and 5 supercapacitors in series.

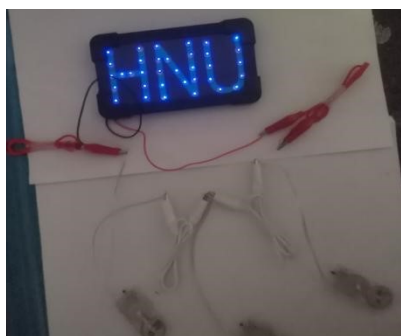

**Figure S7.** The 1.5V sign can be lit by connecting multiple PPy/GEL SCs in series.

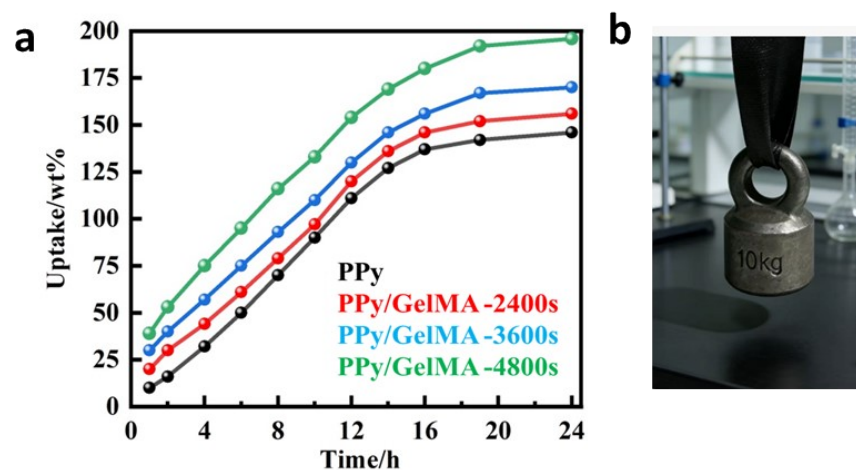

**Figure S8.** (a) The swelling ratio of PPy films and (b) the PPy composite film can suspend a weight of 20 kilograms.

## Supporting Tables

**Table S1** Conjugation Length and Conductivity of PPy/GEL and PPy

| Name          | $I_{1580}/I_{1500}$ | electric conductivity |
|---------------|---------------------|-----------------------|
| PPy/GEL-6000s | 3.349               | 10.314                |
| PPy/GEL-4800s | 3.346               | 10.389                |
| PPy/GEL-3600s | 2.648               | 4.917                 |
| PPy/GEL-2400s | 2.482               | 2.597                 |
| PPy           | 3.313               | 5.473                 |

**Table S2** The equivalent series resistance and charge transfer resistance of PPy/GEL

SCs in different deposition time

| Name          | $R_s$ | $R_{ct}$ |
|---------------|-------|----------|
| PPy/GEL-6000s | 0.963 | 21.823   |
| PPy/GEL-4800s | 0.803 | 7.127    |
| PPy/GEL-3600s | 0.529 | 7.948    |
| PPy/GEL-2400s | 0.329 | 11.3154  |
| Pure PPy      | 1.11  | 120.572  |

**Table S3** Comparison of the performance of PPy/GEL-4800s SC with the performance of other conductive polymer supercapacitors

| Supercapacitor                                               | Capacitance<br>(mF cm <sup>-2</sup> ) | Current<br>density<br>(mA cm <sup>-2</sup> ) | Energy<br>density<br>(μWh cm <sup>-2</sup> ) | Power<br>density<br>(μW cm <sup>-2</sup> ) | Ref.                 |
|--------------------------------------------------------------|---------------------------------------|----------------------------------------------|----------------------------------------------|--------------------------------------------|----------------------|
| <b>PPy/GEL-4800s<br/>SC</b>                                  | <b>260</b>                            | <b>1</b>                                     | <b>13</b>                                    | <b>600</b>                                 | <b>This<br/>work</b> |
| PPy/l-Ti <sub>3</sub> C <sub>2</sub>                         | 35.6                                  | 0.3                                          | NA                                           | NA                                         | [1]                  |
| SiC@PANI                                                     | 47.48                                 | 0.5                                          | 6.59                                         | 250                                        | [2]                  |
| Ti <sub>3</sub> C <sub>2</sub> T <sub>x</sub> -PANI<br>@CNTs | 78.2                                  | 0.1                                          | 2.72                                         | 50                                         | [3]                  |
| PPy/CNTs                                                     | 94.7                                  | 0.1                                          | 32.8                                         | 20                                         | [4]                  |
| Si/PM/rGO-<br>PsAg                                           | 100.98                                | 1.5                                          | 3.4                                          | 2652                                       | [5]                  |
| PEDOT/CNTs                                                   | 128                                   | 1                                            | 3.6                                          | 200                                        | [6]                  |
| TF-PPy/Cu-<br>TCPP                                           | 160                                   | 0.2                                          | 2.28                                         | 50                                         | [7]                  |
| EG-PME-PPy                                                   | 212                                   | 0.8                                          | 9.4                                          | 319.5                                      | [8]                  |
| rGO/PPy                                                      | 222                                   | 0.2                                          | 10                                           | 5000                                       | [9]                  |



## References

- [1] ZHU M, HUANG Y, DENG Q, et al. Highly Flexible, Freestanding Supercapacitor Electrode with Enhanced Performance Obtained by Hybridizing Polypyrrole Chains with MXene [J]. *Advanced Energy Materials*, 2016, 6(21).
- [2] WANG R Y, LI W J, JIANG L, et al. Rationally designed hierarchical SiC@PANI core/shell nanowire arrays: Toward high-performance supercapacitors with high-rate performance and robust stability [J]. *Electrochim Acta*, 2022, 406: 139867.
- [3] WANG Q Q, FANG Y S, CAO M S. Tailoring surface capacitance of Ti<sub>3</sub>C<sub>2</sub>Tx-PANI@CNTs nanoarchitecture for tunable energy storage and high-performance micro-supercapacitor [J]. *Ceram Int*, 2022, 48(15): 21935-44.
- [4] LIU Z X, LIANG G J, ZHAN Y X, et al. A soft yet device-level dynamically super-tough supercapacitor enabled by an energy-dissipative dual-crosslinked hydrogel electrolyte [J]. *Nano Energy*, 2019, 58: 732-42.
- [5] SHEN X J, WANG T F, WEI X Y, et al. Facile synthesis of metal oxide and conductive polymers around silicon nanowire arrays for a high-performance aqueous supercapacitor [J]. *ACS Appl Energy Mater*, 2022, 5(2): 2596-605.
- [6] ZENG J, DONG L B, SHA W X, et al. Highly stretchable, compressible and arbitrarily deformable all-hydrogel soft supercapacitors [J]. *Chem Eng J*, 2020, 383: 123098.
- [7] WANG W K, XU H T, ZHAO W W, et al. Porphyrin-assisted synthesis of hierarchical flower-like polypyrrole arrays based flexible electrode with high areal capacitance [J]. *Chem Eng J*, 2022, 428: 131089.
- [8] HU Q Z, CUI S Z, SUN K J, et al. An antifreezing and thermally stable hydrogel electrolyte for high-performance all-in-one flexible supercapacitor [J]. *J Energy Storage*, 2022, 50: 104231.
- [9] CHEN J C, WANG Y M, CAO J Y, et al. Facile Co-electrodeposition method for high-performance supercapacitor based on reduced graphene oxide/polypyrrole composite film [J]. *ACS Appl Mater Inter*, 2017, 9(23): 19831-42.
